# Supplementary material for: Improvement of Dynamic Performance and Detectivity in Near-Infrared Colloidal Quantum Dot Photodetectors by Incorporating Conjugated Polymers
Source: MDPI journal article supplement (doi:10.3390/molecules27217660), 2022-11-07
Supplement: s1 [file s1]

## Supporting Information

### **Improvement of Dynamic Performance and Detectivity in Near-Infrared Colloidal Quantum Dot Photodetectors by Incorporating Conjugated Polymers**

Myeong In Kim <sup>1</sup>, Jinhyeon Kang <sup>1</sup>, Jahee Park <sup>1</sup>, WonJo Jeong <sup>1</sup>, Junho Kim <sup>2</sup>, Sanggyu Yim <sup>3,\*</sup> and In Hwan Jung <sup>1,\*</sup>

<sup>1</sup> *Department of Organic and Nano Engineering, and Human-Tech Convergence Program, Hanyang University, 222 Wangsimni-ro, Seongdong-gu, Seoul 04763, Republic of Korea*

<sup>2</sup> *Department of Energy Engineering, Hanyang University, 222 Wangsimni-ro, Seongdong-gu, Seoul 04763, Republic of Korea*

<sup>3</sup> *Department of Chemistry, Kookmin University, 77 Jeongneung-ro, Seongbuk-gu, Seoul 02707, Republic of Korea*

\*Correspondence: sgyim@kookmin.ac.kr (S. Yim); inhjung@hanyang.ac.kr (I. H. Jung)

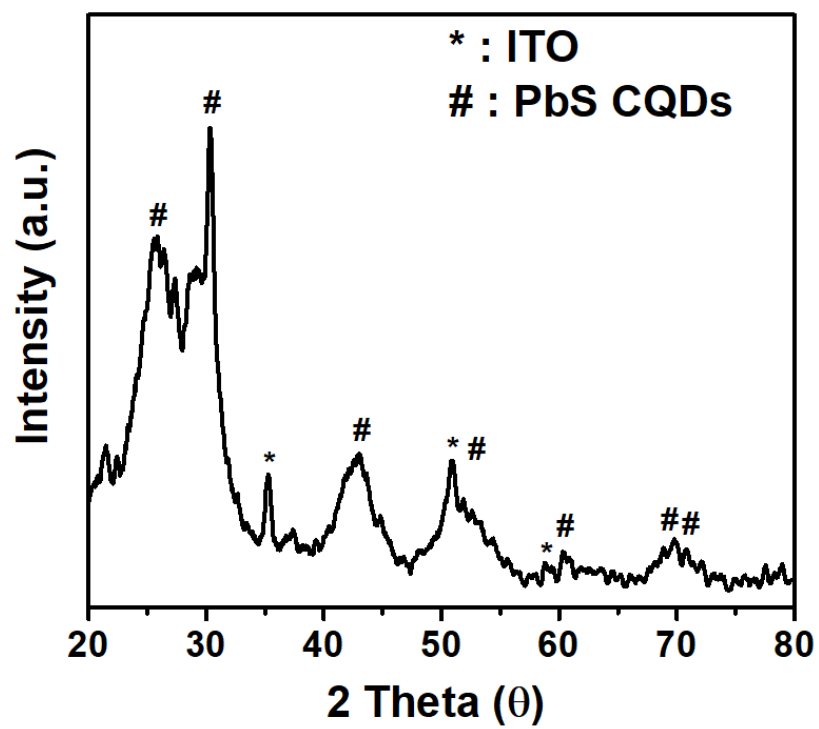

**Figure S1.** X-ray diffraction spectrum of PbS CQD coated on ITO-patterned glass.

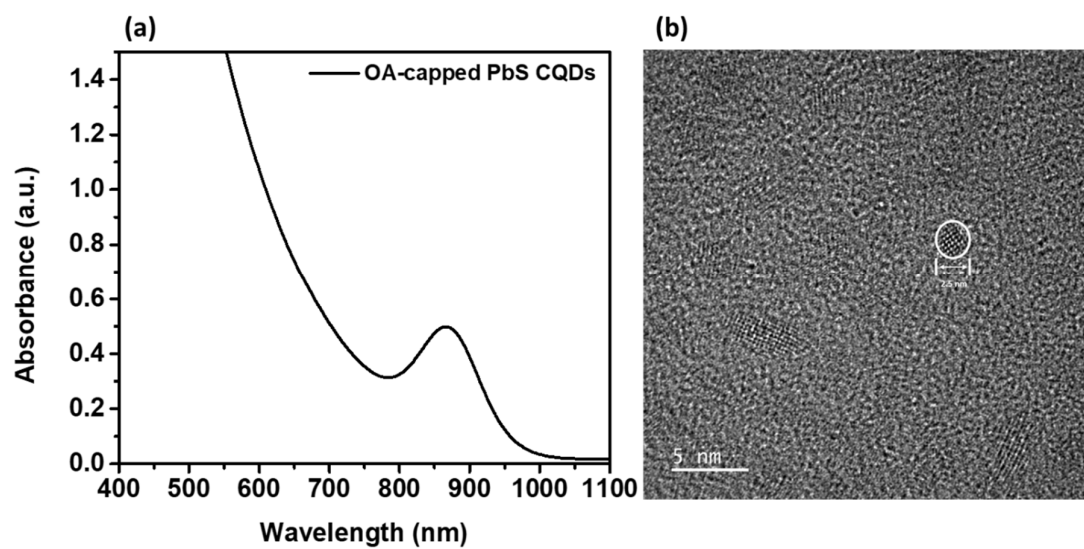

**Figure S2.** (a) UV/Vis absorption spectra and (b) TEM image of synthesized OA-capped PbS CQDs.

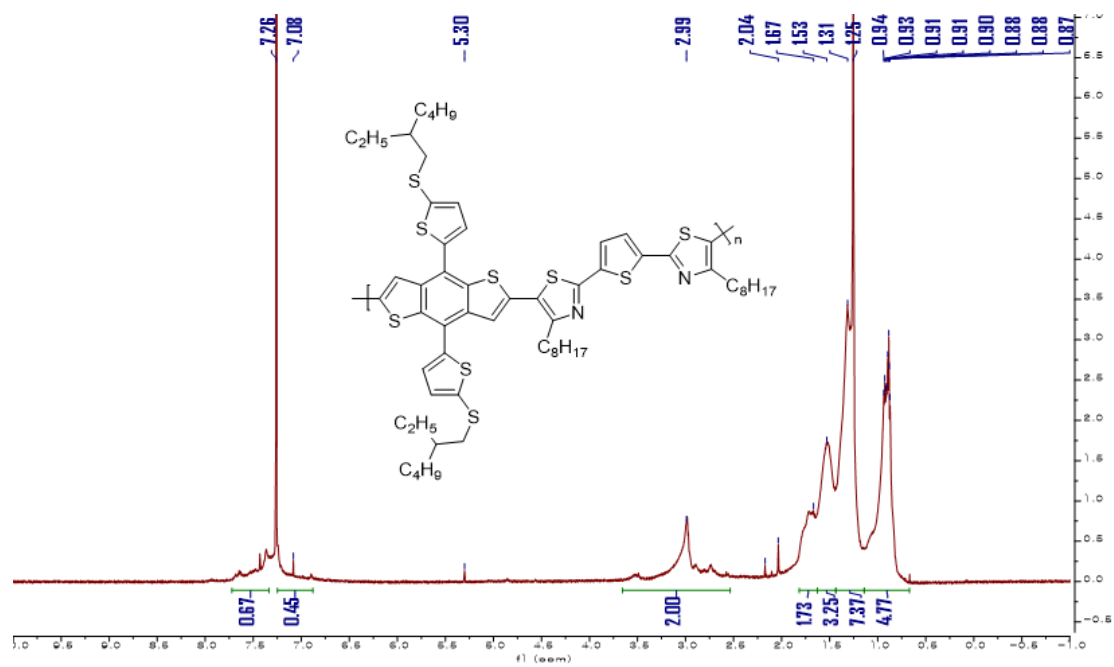

**Figure S3.**  $^1\text{H}$  NMR of PSBOTz

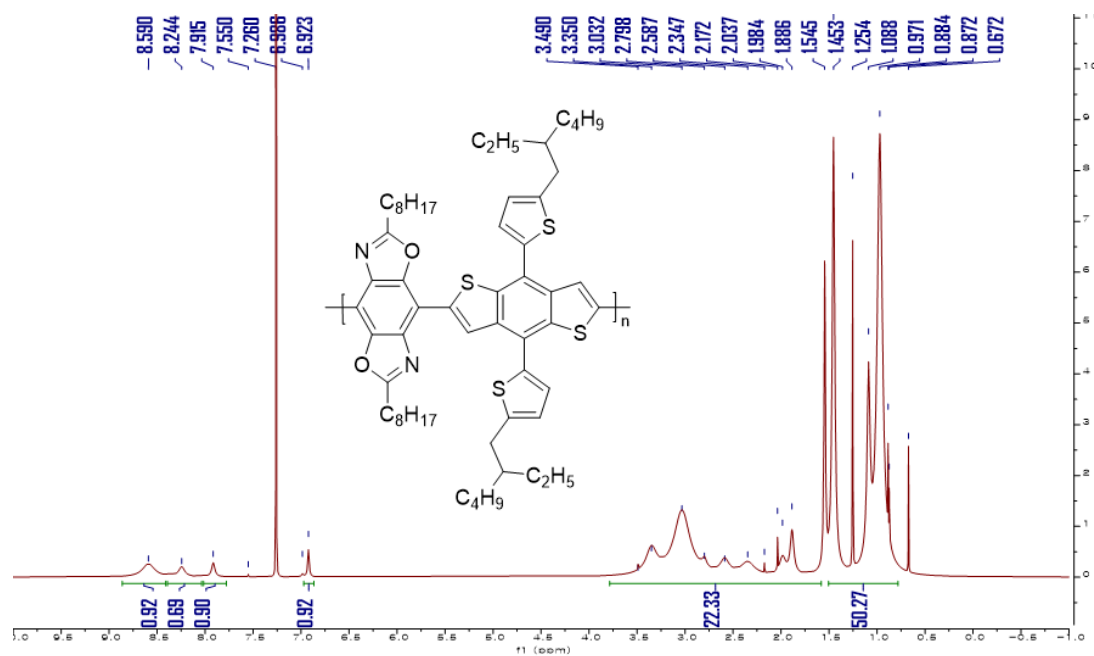

**Figure S4.**  $^1\text{H}$  NMR of PBB

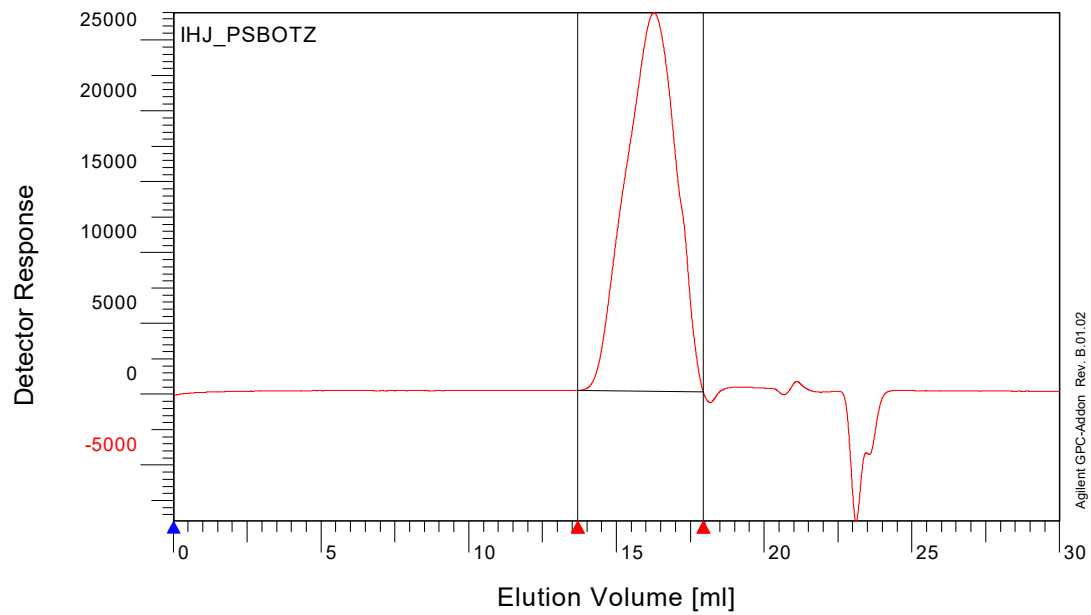

**Figure S5.** GPC results for PSBOTz.

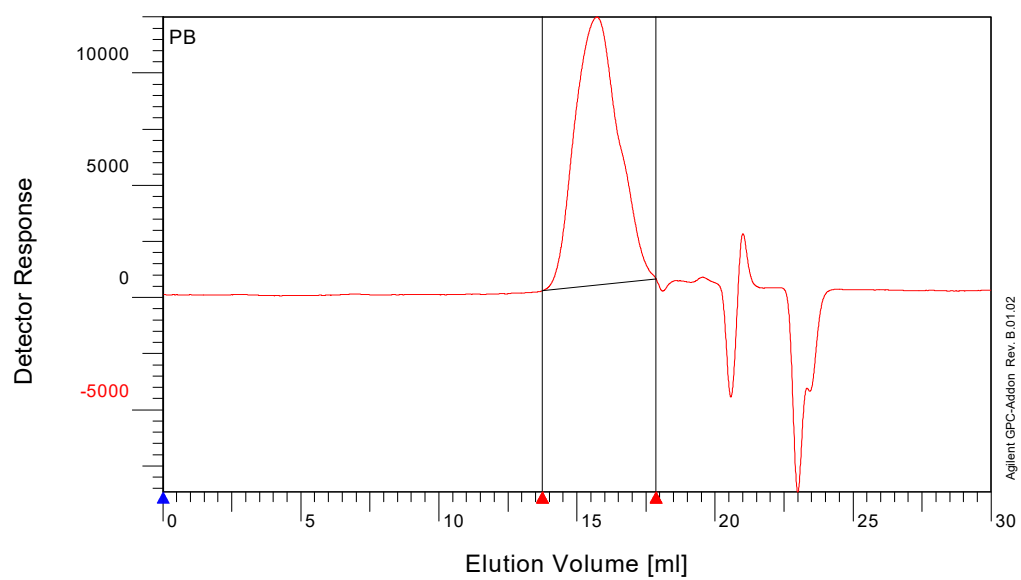

**Figure S6.** GPC results for PBB.

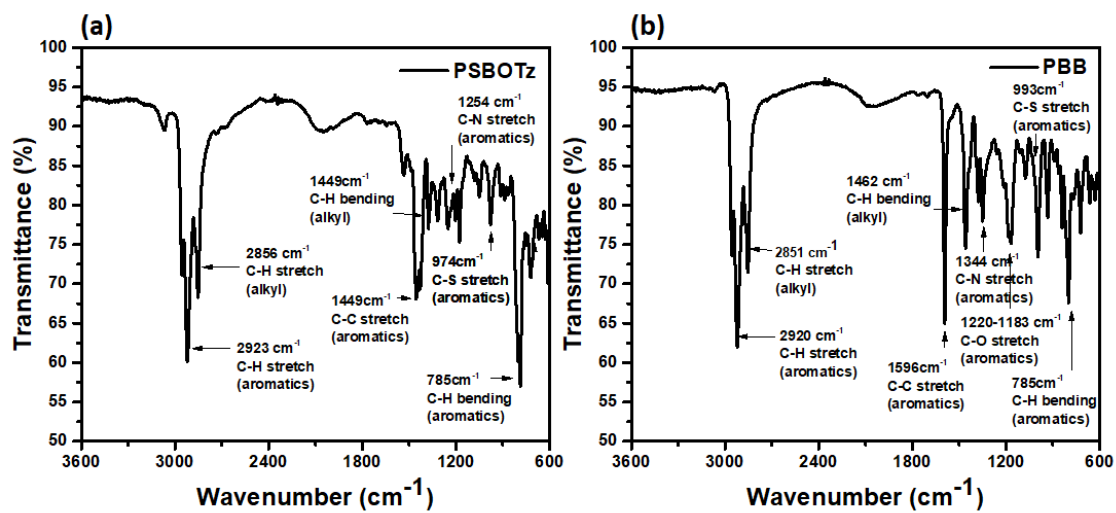

**Figure S7.** FT-IR spectra of (a) PSBOTz and (b) PBB conjugated polymers.



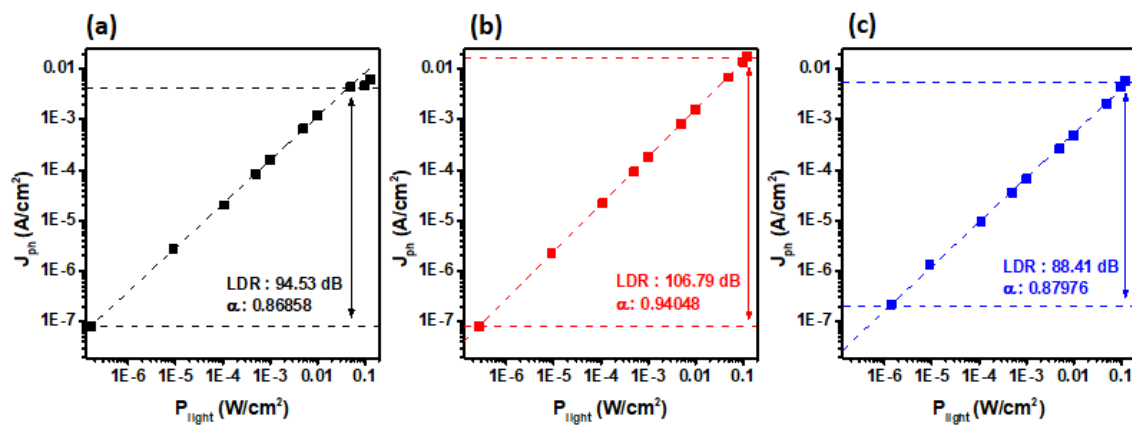

**Figure S8.** Linear dynamic range results for (a) PSBOTz, (b) PBB, and (c) PbS-EDT based devices at  $-1.0$  V bias.

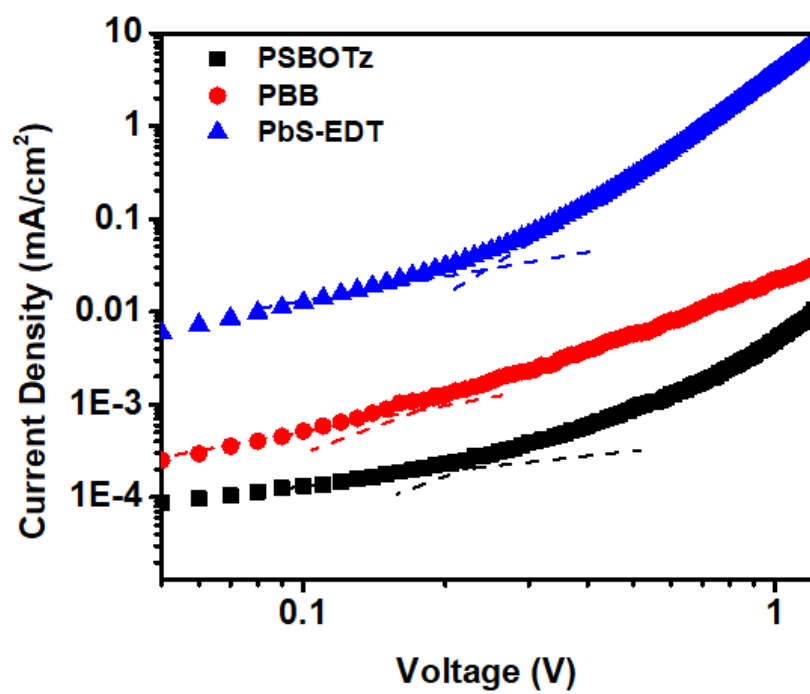

**Figure S9.** SCLC plots using an electron-only device (ITO/ZnO/PbS-EDT or CP/Al) for the trap density calculation.

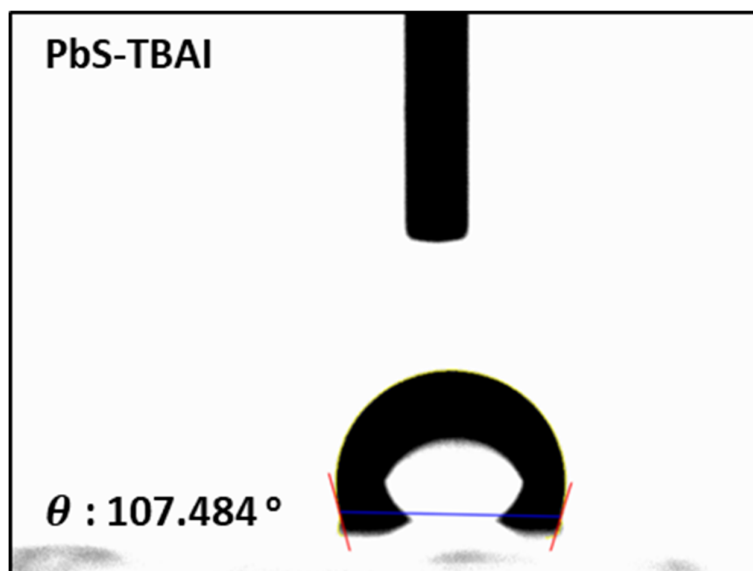

**Figure S10.** Water contact angle result for PbS-TBAI pristine film.

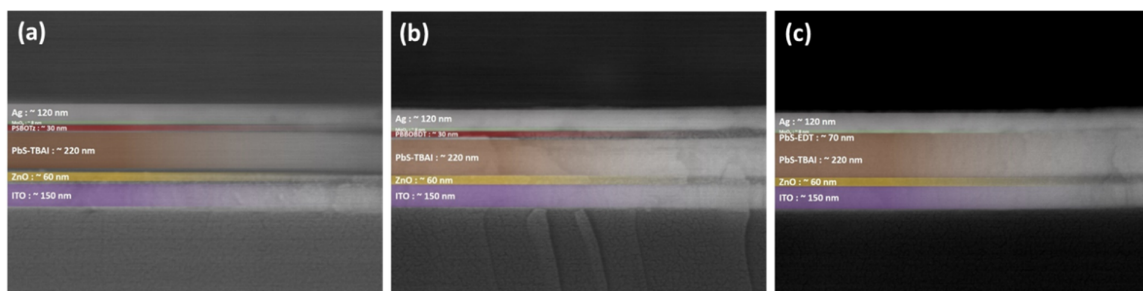

**Figure S11.** Cross-sectional SEM images of (a) PSBOTz, (b) PBB, and (c) PbS-EDT based devices.

**Table S1.** Summary of optical and electrochemical properties of the CPs in this study.

| Polymer | $\lambda_{max}$ [nm] |      | $\lambda_{onset}$<br>[nm] | $E_g^{opt}$<br>(eV) | HOMO<br>(eV) | LUMO<br>(eV) | $E_g$ (eV) |
|---------|----------------------|------|---------------------------|---------------------|--------------|--------------|------------|
|         | Solution             | Film | Film                      |                     |              |              |            |
| PSBOTz  | 508                  | 520  | 611.2                     | 2.029               | −5.054       | −2.928       | 2.126      |
| PBB     | 476                  | 524  | 620.28                    | 1.999               | −5.375       | −3.364       |            |

**Table S2.** Summary of calculated hole mobility, maximum charge generation rate, and trap density value of each fabricated device.

| Hole<br>Transporting<br>Layer | Hole Mobility<br>( $\text{cm}^2 \text{V}^{-1} \text{s}^{-1}$ ) | Maximum Charge<br>Generation Rate<br>( $\text{m}^{-3}\text{s}^{-1}$ ) | Trap Density ( $\text{cm}^{-3}$ ) |
|-------------------------------|----------------------------------------------------------------|-----------------------------------------------------------------------|-----------------------------------|
| PSBOTz                        | $2.75 \times 10^{-3}$                                          | $1.13 \times 10^{26}$                                                 | $9.487 \times 10^{16}$            |
| PBB                           | $9.63 \times 10^{-3}$                                          | $3.66 \times 10^{26}$                                                 | $8.951 \times 10^{16}$            |
| PbS-EDT                       | $1.77 \times 10^{-3}$                                          | $8.36 \times 10^{25}$                                                 | $1.276 \times 10^{17}$            |
